# Supplementary material for: Insight into the dual function of lipid phosphate phosphatase PgpB involved in two essential cell-envelope metabolic pathways in Escherichia coli
Source: PubMed Central journal article supplement (PMC7413402; doi:10.1038/s41598-020-70047-5), 2020-08-06
Supplement: 41598_2020_70047_MOESM1_ESM.pdf [file 41598_2020_70047_MOESM1_ESM.pdf]

## SUPPLEMENTAL MATERIAL

### **Insight into the dual function of lipid phosphate phosphatase PgpB involved in two essential cell-envelope metabolic pathways in *Escherichia coli***

**Xudong Tian<sup>1\*</sup>, Rodolphe Auger<sup>1\*</sup>, Guillaume Manat<sup>1</sup>, Frédéric Kerff<sup>2</sup>, Dominique Mengin-Lecreulx<sup>1</sup>, and Thierry Touzé<sup>1#</sup>**

<sup>1</sup> Université Paris-Saclay, CEA, CNRS, Institute for Integrative Biology of the Cell (I2BC), 91198, Gif-sur-Yvette, France

<sup>2</sup> Centre d'Ingénierie des Protéines, InBioS, Université de Liège, Liège, Belgium

\*These authors contributed equally

<sup>#</sup>To whom correspondence should be addressed : Thierry Touzé, Université Paris-Saclay, CEA, CNRS, Institute for Integrative Biology of the Cell (I2BC), 91198, Gif-sur-Yvette, France  
[thierry.touze@i2bc.paris-saclay.fr](mailto:thierry.touze@i2bc.paris-saclay.fr)

**Table S1.** Plasmids

|                     |                                                                             |            |
|---------------------|-----------------------------------------------------------------------------|------------|
| pMAK <i>bacA</i>    | Cam <sup>R</sup>                                                            | 4          |
| p <i>TrcHis60</i>   | Amp <sup>R</sup>                                                            | 33         |
| p <i>TrcHis30</i>   | Amp <sup>R</sup>                                                            | 33         |
| p <i>TrcBac30</i>   | p <i>TrcHis30</i> derivative for overproduction of N-His <sub>6</sub> -BacA | 3          |
| p <i>TrcH60ybjG</i> | p <i>TrcHis60</i> derivative for overproduction of C-His <sub>6</sub> -YbjG | This study |
| p <i>TrcH60lpxT</i> | p <i>TrcHis60</i> derivative for overproduction of C-His <sub>6</sub> -LpxT | 5          |
| p <i>TrcH60pgpB</i> | p <i>TrcHis60</i> derivative for overproduction of C-His <sub>6</sub> -PgpB | 6          |
| p <i>TrcH30ynbD</i> | p <i>TrcHis30</i> derivative for overproduction of N-His <sub>6</sub> -YnbD | This study |
| p <i>TrcH60pgpA</i> | p <i>TrcHis60</i> derivative for overproduction of C-His <sub>6</sub> -PgpA | This study |
| p <i>TrcH60pgpC</i> | p <i>TrcHis60</i> derivative for overproduction of C-His <sub>6</sub> -PgpC | This study |
| pKD4                | PCR amplification of Kan <sup>R</sup> cassette for gene deletion            | 31         |
| pCP20               | Resistance cassette removal by Flp recombinase expression                   | 31         |
| pKD46               | Resistance cassette insertion by lambda red recombinase expression          | 31         |
| pA727               | p <i>TrcH60pgpB</i> variant with PgpB K97A mutation                         | This study |
| pA730               | p <i>TrcH60pgpB</i> variant with PgpB ΔV100 mutation                        | This study |
| pA733               | p <i>TrcH60pgpB</i> variant with PgpB R104A mutation                        | This study |
| pA737               | p <i>TrcH60pgpB</i> variant with PgpB P105A mutation                        | This study |
| pA741               | p <i>TrcH60pgpB</i> variant with PgpB A158S mutation                        | This study |
| pA745               | p <i>TrcH60pgpB</i> variant with PgpB F159A mutation                        | This study |
| pA762               | p <i>TrcH60pgpB</i> variant with PgpB P160A mutation                        | This study |
| pA766               | p <i>TrcH60pgpB</i> variant with PgpB S161A mutation                        | This study |
| pA771               | p <i>TrcH60pgpB</i> variant with PgpB G162A mutation                        | This study |
| pA749               | p <i>TrcH60pgpB</i> variant with PgpB G162D mutation                        | This study |
| pA798               | p <i>TrcH60pgpB</i> variant with PgpB H163A mutation                        | This study |
| pA802               | p <i>TrcH60pgpB</i> variant with PgpB T164A mutation                        | This study |
| pB244               | p <i>TrcH60pgpB</i> variant with PgpB H150A mutation                        | This study |
| pA807               | p <i>TrcH60pgpB</i> variant with PgpB S200A mutation                        | This study |
| pA812               | p <i>TrcH60pgpB</i> variant with PgpB R201A mutation                        | This study |
| pA817               | p <i>TrcH60pgpB</i> variant with PgpB L202A mutation                        | This study |
| pA822               | p <i>TrcH60pgpB</i> variant with PgpB G205A mutation                        | This study |
| pA828               | p <i>TrcH60pgpB</i> variant with PgpB H207A mutation                        | This study |
| pA833               | p <i>TrcH60pgpB</i> variant with PgpB W208A mutation                        | This study |
| pA838               | p <i>TrcH60pgpB</i> variant with PgpB P209A mutation                        | This study |
| pA843               | p <i>TrcH60pgpB</i> variant with PgpB D211A mutation                        | This study |
| pA847               | p <i>TrcH60pgpB</i> variant with PgpB L212A mutation                        | This study |
| pA852               | p <i>TrcH60pgpB</i> variant with PgpB A215G mutation                        | This study |
| pA857               | p <i>TrcH60pgpB</i> variant with PgpB S219A mutation                        | This study |
| pB089               | p <i>TrcH60pgpB</i> variant with PgpB R6A mutation                          | This study |
| pB093               | p <i>TrcH60pgpB</i> variant with PgpB R7A mutation                          | This study |

|       |                                                                                              |            |
|-------|----------------------------------------------------------------------------------------------|------------|
| pB232 | <i>pTrcH60pgpB</i> variant with PgpB H57A mutation                                           | This study |
| pB115 | <i>pTrcH60pgpB</i> variant with PgpB R69A mutation                                           | This study |
| pB099 | <i>pTrcH60pgpB</i> variant with PgpB R71A mutation                                           | This study |
| pB103 | <i>pTrcH60pgpB</i> variant with PgpB K73A mutation                                           | This study |
| pB107 | <i>pTrcH60pgpB</i> variant with PgpB R181A mutation                                          | This study |
| pB111 | <i>pTrcH60pgpB</i> variant with PgpB R182A mutation                                          | This study |
| pB118 | <i>pTrcH60pgpB</i> variant with PgpB R183 mutation                                           | This study |
| pB121 | <i>pTrcH60pgpB</i> variant with PgpB R181A-R182A mutations                                   | This study |
| pB124 | <i>pTrcH60pgpB</i> variant with PgpB R182A-R183A mutations                                   | This study |
| pB127 | <i>pTrcH60pgpB</i> variant with PgpB R232A mutation                                          | This study |
| pB194 | <i>pTrcH60pgpB</i> variant with PgpB $\Delta$ 236-254 ( $\Delta$ C <sup>ter</sup> ) deletion | This study |
| pB877 | <i>pTrcH60pgpB</i> variant with PgpB E154A mutation                                          | This study |
| pB881 | <i>pTrcH60pgpB</i> variant with PgpB E154A–H163A mutations                                   | This study |

**Table S2.** Phosphatase activities in membranes of *E. coli* mutants.

| Substrate               | Relative activities (% of WT) |           |
|-------------------------|-------------------------------|-----------|
|                         | C <sub>55</sub> -PP           | PGP       |
| BW25113                 | 100 +/- 2                     | 100 +/- 3 |
| BW $\Delta$ <i>pgpB</i> | 96 +/- 11                     | 7 +/- 8   |
| BW <i>pgpB</i> -single  | 7 +/- 3                       | 73 +/- 20 |

The C<sub>55</sub>-PP and PGP phosphatase activities of BW25113, BW $\Delta$ *pgpB* and BW*pgpB*-single strains were measured and normalized by the quantity of proteins in each membrane extracts. The relative activities as compared to the WT strain membrane extracts are indicated. Each value is the mean of three independent measurements.

**Table S3.** Quantitative RT-PCR analysis of *pgpB* transcripts.

| Plasmid            | IPTG | PgpB expression                   |
|--------------------|------|-----------------------------------|
|                    |      | (ratio of chromosomal expression) |
| none               | -    | 1                                 |
| <i>pTrcH60pgpB</i> | -    | 33 +/- 6                          |
|                    | +    | 2003 +/- 362                      |

BW25113 cells carrying either no plasmid or *pTrcH60pgpB* were grown in 2YT medium in the presence or not of 1 mM IPTG up to A<sub>600nm</sub> = 0.5. The total RNA was extracted and quantitative RT-PCR analysis was performed using appropriate primers (Table S4) and reference genes for normalization.

**Table S4. Primers**Gene inactivation

|                     |                                                |                          |
|---------------------|------------------------------------------------|--------------------------|
| Inact1- <i>ynbD</i> | ACGTTTTTCGATGGCGGTGCGTCGTGATAACTGAACGTCGGAACGT | <i>ynbD</i> inactivation |
| Inact2- <i>ynbD</i> | TAGATATTCAGTCCACATCTCAATCCACTTACCTGTTTTCCATA   |                          |

Gene cloning<sup>a</sup>

|                                   |                                        |                                                       |
|-----------------------------------|----------------------------------------|-------------------------------------------------------|
| <i>ybjGNcoI</i>                   | GCGCCCATGGTGGAAAATTTGAATCTCTCTCTATTC   | Cloning of <i>ybjG</i> in pTrcHis60                   |
| <i>ybjGBglII</i>                  | CTTTTTAGCAGAGATCTGTACGCACCCAGCC        |                                                       |
| <i>ynbDBamHI</i>                  | GCGCGGATCCCTACAAGGCGCTGGCTGGTTATTGTTGC | Cloning of <i>ynbD</i> in pTrcHis30                   |
| <i>ynbDHindIII</i>                | GCGCAAGCTTTTACCTGTTTTCCATAATCTCAGC     |                                                       |
| <i>pgpBNcoI</i>                   | GCGCCCATGGCCATGCGTTCGATTGCCAGACGTACC   | Cloning of <i>pgpB</i> in pTrcHis60                   |
| <i>pgpBBglII</i>                  | GCGCAGATCTACTTTCTTGTCTCGTTGCGCTAT      |                                                       |
| <i>pgpBBglII-ΔC<sup>ter</sup></i> | CGCGAGATCTTGGCCCAAAATTCGTTGCGC         | Cloning of <i>pgpB</i> ΔC <sup>ter</sup> in pTrcHis60 |
| <i>pgpANcoI</i>                   | GCGCCCATGGTGACCATTTTGCCACGCCATAAAG     | Cloning <i>pgpA</i> in pTrcH60                        |
| <i>pgpABglII</i>                  | GCGCAGATCTCGACAGAATACCCAGCGGCCAGTG     |                                                       |
| <i>pgpCNcoI</i>                   | GCGCCCATGGTGGCAACTCACGAGCGTCGTGTGGTG   | Cloning of <i>pgpC</i> in pTrcHis60                   |
| <i>pgpCBglII</i>                  | GCGCAGATCTTTCCAGTTGCTGGAGTTCACCGCG     |                                                       |

*pgpB* site-directed mutagenesis<sup>b</sup>

|       |                                   |
|-------|-----------------------------------|
| K97A  | GTAAATCCTGGATCGCAGACAAAGTCCAGG    |
| ΔV100 | CCTGGATCAAAGACAAACAGGAACCACGACC   |
| R104A | CAAAGTCCAGGAACCAGCACCTTTTGTATCTGG |
| P105A | GTCCAGGAACCACGAGCTTTTGTATCTGGCTG  |
| E154A | CACACTGGCAGAAAGCGACGGGGTTTGCCTTTC |
| A158S | GAAAGAGACGGGGTTTAGCTTTCCTTCCGGTC  |
| F159A | GAGACGGGGTTTGCCGCTCCTTCCGGTCACAC  |
| P106A | CGGGGTTTGCCTTTGCTTCCGGTCACACG     |
| S161A | GGGTTTGCCTTTCCTGCCGGTCACACGATG    |
| G162A | GTTTGCCTTTCCTTCCGCTCACACGATGTTTG  |
| G162D | GTTTGCCTTTCCTTCCGATCACACGATGTTTG  |
| H163A | GCCTTTCCTTCCGGTGCCACGATGTTTGCTGC  |
| T164A | CTTTCCTTCCGGTCACGCGATGTTTGCTGCC   |
| S200A | CGGGAGTCATGGGAGCCCGCCTGCTGCTCGG   |
| R201A | GGAGTCATGGGAAGCGCCCTGCTGCTCGGG    |
| L202A | GTCATGGGAAGCCGCGCTGCTCGGGATGC     |
| G205A | GCCGCCTGCTGCTCGCGATGCATTGGCCACGC  |
| H207A | CTGCTGCTCGGGATGGCTTGGCCACGCGATCTG |
| W208A | CTGCTCGGGATGCATGCGCCACGCGATCTGG   |
| P209A | CTCGGGATGCATTGGGCACGCGATCTGGTAG   |
| D211A | GCATTGGCCACGCGCTCTGGTAGTAGCTACG   |
| L212A | CATTGGCCACGCGATGCGGTAGTAGCTACGTTG |
| A215G | GCGATCTGGTAGTAGGTACGTTGATTTTCGTG  |

|           |                                     |
|-----------|-------------------------------------|
| S219A     | GTAGCTACGTTGATTGCGTGGGCGCTGGTGG     |
| R6A       | GCGTTCGATTGCCGCACGTACCGCAGTGG       |
| R7A       | GTTCGATTGCCAGAGCTACCGCAGTGGGAG      |
| H57A      | GGCGTCATTACAGCTTTGATTTTATTCGG       |
| R69A      | GTTTCTCTGGTGTCTGGCTTTTCGCATTAAGG    |
| R71A      | GGTGTCTGCGTTTTGCCATTAAGGCTGCC       |
| K73A      | CTGCGTTTTTCGCATTGCGGCTGCCTTTGTAT    |
| R181A     | GTTTGCTGTGGCCGGCTCGGCGAACGTTAAC     |
| R182A     | GCTGTGGCCGCGTGC GCGAACGTTAAC        |
| R183A     | GTGGCCGCGTCGGGCAACGTTAACCATTG       |
| R181-182A | GGTTTGCTGTGGCCGGCTGCGCGAACGTTAACCAT |
| R182-183A | GCTGTGGCCGCGTGC GCGAACGTTAACCATTGC  |
| R232A     | CGTGGCTTGC GCAAGCAATTTGTGGGCC       |

Quantitative PCR

|            |                       |
|------------|-----------------------|
| 198-pgpB-F | GTGTCTGCGTTTTTCGCATTA |
| 320-pgpB-R | ACAAAAGGTCGTGGTTCCTG  |
| 394-gyrA-F | TGAACGGTTCTTCCGGTATC  |
| 635-gyrA-R | ATGTGTTCCATCAGCCCTTC  |
| 1163-ffh-F | GCGCTAAGCCAGAAATCATC  |
| 1304-ffh-R | ATCCGCCCTTCTTCATTTT   |
| 284-rrsA-F | CAGCCCACTGGAACTGAGA   |
| 400-rrsA-R | CCGAAGGCCTTTTTCATACA  |

---

<sup>a</sup>The restriction site used for the insertion of the amplicon in the expression vector is indicated in the primer's name and it is underlined in the sequence. <sup>b</sup>Of the two primers used for site-directed mutagenesis, only one sequence is indicated, the other sequence being its reverse complement.

**Table S5.** Functional complementation of thermosensitive strains by PgpB variants

| Plasmid                   | protein                                 | BWTetra-TsbacA |        | BWPGPTs |        |
|---------------------------|-----------------------------------------|----------------|--------|---------|--------|
|                           |                                         | - IPTG         | + IPTG | - IPTG  | + IPTG |
| pTrcHis60                 | none                                    | -              | -      | -       | -      |
| pTrcH60pgpB               | PgpB                                    | +              | +      | +       | +      |
| <b>N-terminus</b>         |                                         |                |        |         |        |
| pB089                     | R6A                                     | +              | +      | +       | +      |
| pB093                     | R7A                                     | -              | +      | +       | +      |
| <b>TM 2</b>               |                                         |                |        |         |        |
| pB232                     | H57A                                    | +              | +      | +       | +      |
| <b>Cytoplasmic loop 1</b> |                                         |                |        |         |        |
| pB115                     | R69A                                    | +              | +      | +       | +      |
| pB099                     | R71A                                    | +              | +      | +       | +      |
| pB103                     | K73A                                    | +              | +      | +       | +      |
| <b>Cytoplasmic loop 2</b> |                                         |                |        |         |        |
| pB107                     | R181A                                   | +              | +      | +       | +      |
| pB111                     | R182A                                   | +              | +      | +       | +      |
| pB118                     | R183                                    | +              | +      | +       | +      |
| pB121                     | R181A-R182A                             | +              | +      | +       | +      |
| pB124                     | R182A-R183A                             | +              | +      | +       | +      |
| <b>C-terminus</b>         |                                         |                |        |         |        |
| pB127                     | R232A                                   | +              | +      | +       | +      |
| pB194                     | $\Delta 236-254(\Delta C_{\text{ter}})$ | +              | +      | +       | +      |

The plasmids carrying a copy of *pgpB* (wild-type or variants) were tested for their ability to restore the growth at 42°C of thermosensitive strains BWTetra-TsbacA and BWPGPTs. +, normal growth at 42°C; - no growth at 42°C.

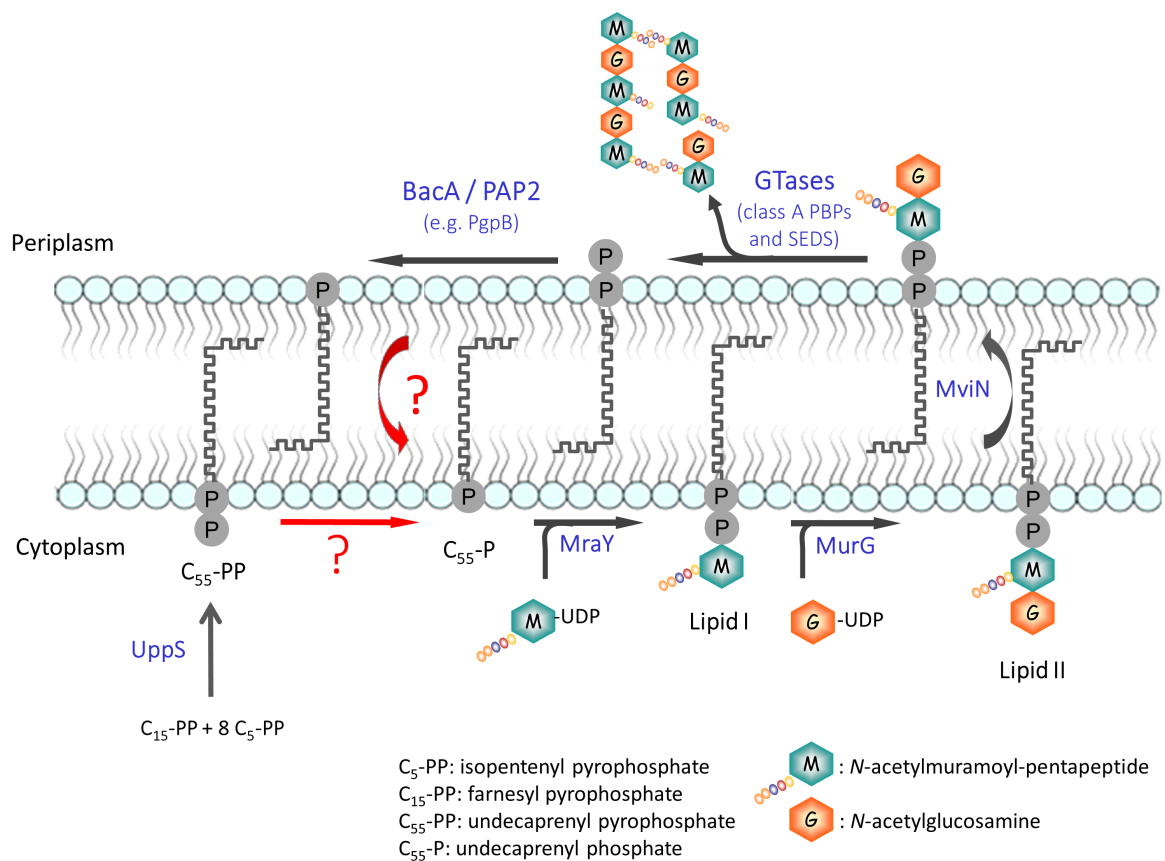

**Figure S1.** Schematic representation of C<sub>55</sub>-P metabolism and peptidoglycan biosynthesis. The C<sub>55</sub>-PP is *de novo* synthesized by UppS at the cytosolic face of the membrane; thereafter it is dephosphorylated, by a yet unknown enzyme, to yield the C<sub>55</sub>-P lipid carrier. The MraY and MurG enzymes catalyze the successive transfers of phospho-*N*-acetylmuramoyl-pentapeptide and *N*-acetylglucosamine moieties from nucleotide precursors to C<sub>55</sub>-P, yielding lipid II. The lipid II is flipped to the periplasmic face of the membrane, where glycosyltransferases (GTases) transfer the glycan-peptide moiety to the nascent polymer. GTases release C<sub>55</sub>-PP as a by-product, which is then recycled through a dephosphorylation step by BacA or PAP2 enzymes and a flip back to the inner side, by a yet unknown mechanism, to enter a new cycle of peptidoglycan biosynthesis.

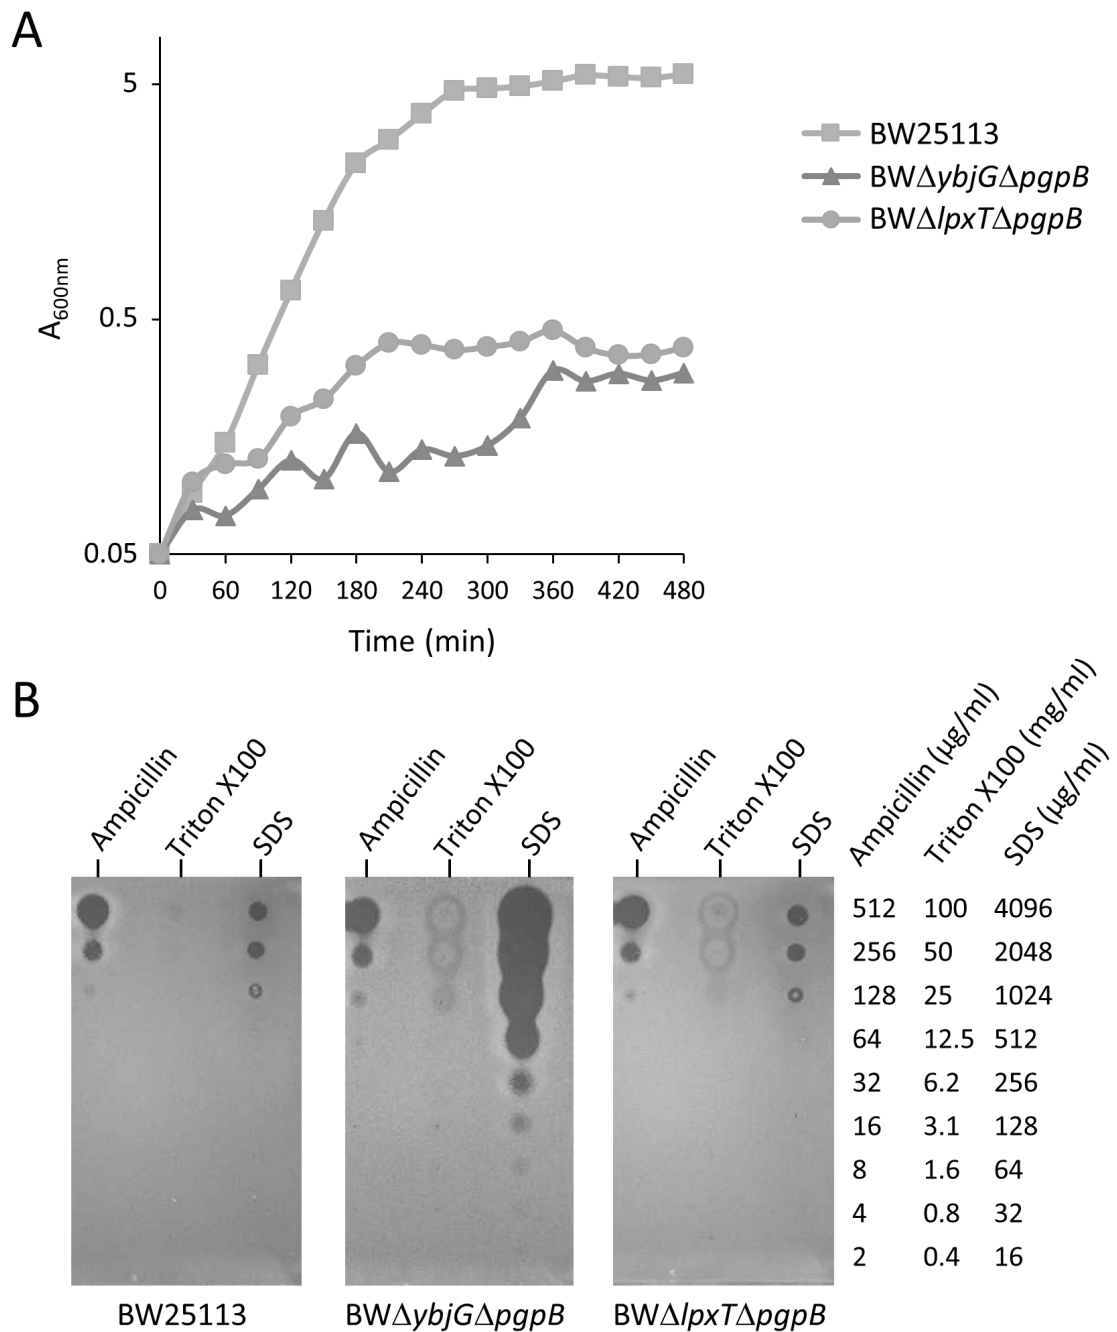

**Figure S2.** Multiple inactivation of PAP2s differentially sensitizes the cells to small hydrophobic compounds. (A) Cell growth was monitored at 37°C in 2YT medium containing 20 mg/ml of DOC. (B) 2YT-agar plates were overlaid with the indicated strains and 5 μl of serial dilutions (as indicated on the left) of ampicillin, Triton X100 or SDS were dropped on these plates.



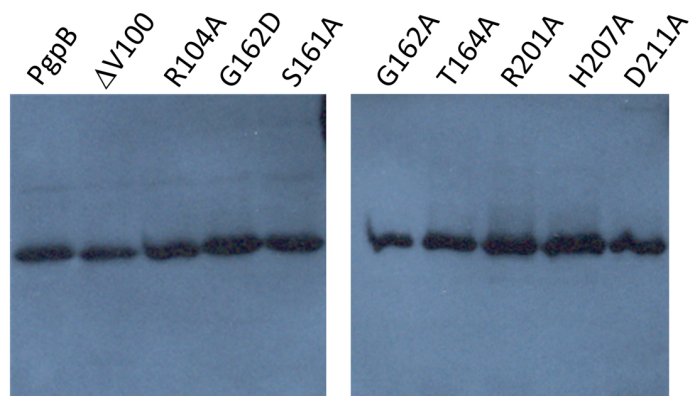

**Figure S3.** Expression of PgpB WT and variants presenting a default of complementation. Immunoblotting analysis of membrane fractions isolated from BW25113 cells producing PgpB and its variants from the *pTrcHis60* vector. Total DDM-solubilized membrane proteins (5  $\mu$ g) were separated by SDS-PAGE and analyzed by immunoblotting with anti-His antibodies.

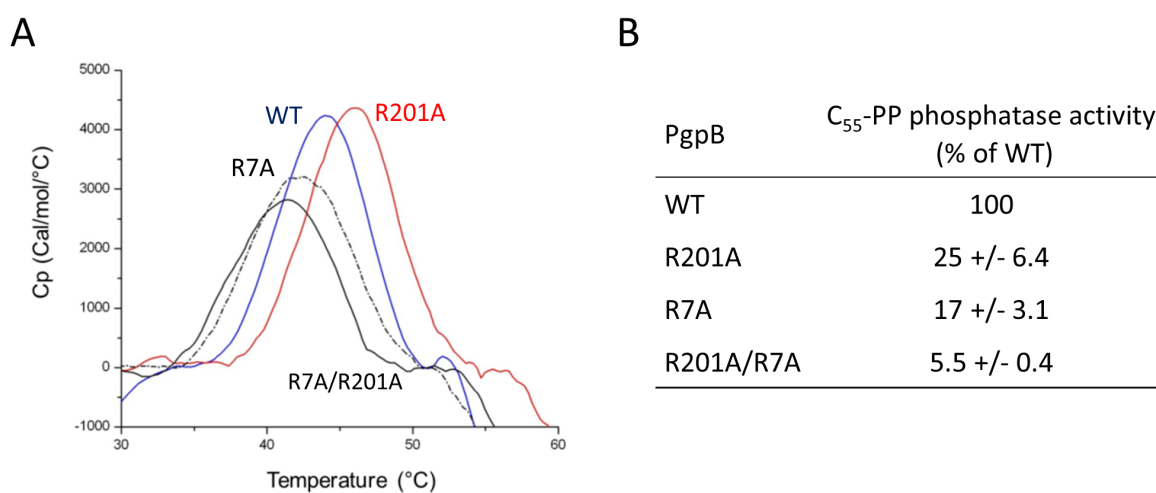

**Figure S4.** Thermal stability and activity of PgpB variants. (A) DSC measurements were performed with proteins at a concentration of 0.5 mg/ml in potassium phosphate buffer, pH 6.0. (B) The  $C_{55}$ -PP phosphatase activity of the variants is expressed as a percentage of the WT PgpB activity.
